# Supplementary material for: Tumor Immune Microenvironment Characterization in Hepatocellular Carcinoma Identifies Four Prognostic and Immunotherapeutically Relevant Subclasses
Source: Front Oncol. 2021 Feb 19;10:610513. doi: 10.3389/fonc.2020.610513 (PMC7933665; doi:10.3389/fonc.2020.610513)
Supplement: Supplementary file 4 [file DataSheet_4.xlsx]

## Sheet: Table S1
Supplementary Table 1: Cell-type specific genes and pathways used by the Microenvironment Cell Populations (MCP)-counter package.
Signature type	Signature	Gene
MCP-counter	Lymphoid	ZNF831
MCP-counter	Lymphoid	PARP15
MCP-counter	Lymphoid	LCK
MCP-counter	Lymphoid	PTPRCAP
MCP-counter	Lymphoid	CD27
MCP-counter	Lymphoid	LTA
MCP-counter	Lymphoid	TRAC
MCP-counter	Lymphoid	TRBC1
MCP-counter	Lymphoid	PVRIG
MCP-counter	Lymphoid	CLEC2D
MCP-counter	Lymphoid	CARD11
MCP-counter	Lymphoid	BACH2
MCP-counter	Lymphoid	SEPT1
MCP-counter	Lymphoid	PCED1B
MCP-counter	NK_or_T	CD96
MCP-counter	NK_or_T	ZAP70
MCP-counter	NK_or_T	CHRM3-AS2
MCP-counter	NK_or_T	THEMIS
MCP-counter	NK_or_T	CD6
MCP-counter	NK_or_T	CD2
MCP-counter	NK_or_T	CD3G
MCP-counter	NK_or_T	CD247
MCP-counter	NK_or_T	PRKCQ
MCP-counter	NK_or_T	SH2D1A
MCP-counter	NK_or_T	ICOS
MCP-counter	NK_or_T	FLT3LG
MCP-counter	NK_or_T	TNFRSF25
MCP-counter	NK_or_T	CD3D
MCP-counter	NK_or_T	CD7
MCP-counter	NK_or_T	TRAT1
MCP-counter	NK_or_T	BCL11B
MCP-counter	NK_or_T	CD5
MCP-counter	NK_or_T	PRKCQ-AS1
MCP-counter	NK_or_T	TIGIT
MCP-counter	T_adaptative	MAL
MCP-counter	T_adaptative	CD28
MCP-counter	T_adaptative	SIRPG
MCP-counter	T_adaptative	TRAC
MCP-counter	T_adaptative	TRAV12-1
MCP-counter	T_adaptative	CAMK4
MCP-counter	Cytotoxic	KLRC4-KLRK1
MCP-counter	Cytotoxic	CD8A
MCP-counter	Cytotoxic	KLRC1
MCP-counter	Cytotoxic	KLRC3
MCP-counter	Cytotoxic	KLRD1
MCP-counter	Cytotoxic	KLRC4
MCP-counter	Cytotoxic	FGFBP2
MCP-counter	Cytotoxic	EOMES
MCP-counter	Cytotoxic	GNLY
MCP-counter	B_derived	IGKC
MCP-counter	B_derived	LINC00926
MCP-counter	B_derived	IGHM
MCP-counter	B_derived	CKAP2
MCP-counter	B_derived	FCRL1
MCP-counter	B_derived	CLLU1
MCP-counter	B_derived	IGLV1-44
MCP-counter	B_derived	EBF1
MCP-counter	B_derived	IGHG1
MCP-counter	B_derived	IGHA1
MCP-counter	B_derived	PAX5
MCP-counter	B_derived	IGLL5
MCP-counter	B_derived	CPNE5
MCP-counter	B_derived	IGHD
MCP-counter	B_derived	FCRL3
MCP-counter	B_derived	BANK1
MCP-counter	B_derived	AC079767.4
MCP-counter	B_derived	AC128677.4
MCP-counter	B_derived	IGLJ3
MCP-counter	B_derived	CD79A
MCP-counter	B_derived	CPNE5
MCP-counter	B_derived	FCRLA
MCP-counter	B_derived	STAP1
MCP-counter	B_derived	SNX29P1
MCP-counter	B_derived	IGLC1
MCP-counter	B_derived	ABCB4
MCP-counter	B_derived	MS4A1
MCP-counter	B_derived	FCRL5
MCP-counter	B_derived	DTX1
MCP-counter	B_derived	FCRL2
MCP-counter	B_derived	CD22
MCP-counter	B_derived	IGKV1-37
MCP-counter	B_derived	CR2
MCP-counter	B_derived	CD19
MCP-counter	B_derived	RALGPS2
MCP-counter	B_derived	CD79B
MCP-counter	B_derived	IGLV4-60
MCP-counter	B_derived	LOC101929272
MCP-counter	B_derived	SNX22
MCP-counter	B_derived	IGKV1-17
MCP-counter	B_derived	KLHL14
MCP-counter	B_derived	LOC100507616
MCP-counter	B_derived	VPREB3
MCP-counter	B_derived	BMS1P20
MCP-counter	B_derived	IGKV1OR2-108
MCP-counter	B_derived	IGHV5-78
MCP-counter	Myeloid	HSPA6
MCP-counter	Myeloid	CLEC12A
MCP-counter	Myeloid	NLRC4
MCP-counter	Myeloid	CLEC4D
MCP-counter	Myeloid	CD300LF
MCP-counter	Myeloid	CLEC7A
MCP-counter	Myeloid	OSCAR
MCP-counter	Myeloid	SIRPB1
MCP-counter	Myeloid	SIRPB2
MCP-counter	Myeloid	LOC731424
MCP-counter	Myeloid	ATP6V1B2
MCP-counter	Myeloid	CD14
MCP-counter	Myeloid	TNFAIP2
MCP-counter	Myeloid	SERPINA1
MCP-counter	Myeloid	MPP1
MCP-counter	Myeloid	S100A9
MCP-counter	Myeloid	FCGR2A
MCP-counter	Myeloid	CSF3R
MCP-counter	Myeloid	SLC31A2
MCP-counter	Myeloid	PLEKHO2
MCP-counter	Myeloid	FGL2
MCP-counter	Myeloid	TYMP
MCP-counter	Myeloid	TLR2
MCP-counter	Myeloid	CCR1
MCP-counter	Myeloid	FPR1
MCP-counter	Myeloid	HCAR3
MCP-counter	Myeloid	SPI1
MCP-counter	Myeloid	AQP9
MCP-counter	Myeloid	HK3
MCP-counter	Myeloid	PTAFR
MCP-counter	Myeloid	IGSF6
MCP-counter	Myeloid	LILRA3
MCP-counter	Myeloid	EMR2
MCP-counter	Myeloid	LILRA2
MCP-counter	Myeloid	HCK
MCP-counter	Myeloid	TBXAS1
MCP-counter	Myeloid	AIF1
MCP-counter	Myeloid	NCF2
MCP-counter	Myeloid	LILRB2
MCP-counter	Myeloid	ITGAX
MCP-counter	Myeloid	LILRB3
MCP-counter	Myeloid	SLC11A1
MCP-counter	Myeloid	SIGLEC9
MCP-counter	Myeloid	LST1
MCP-counter	Myeloid	LILRA1
MCP-counter	Myeloid	FPR2
MCP-counter	Myeloid	ASAH1
MCP-counter	Myeloid	FCAR
MCP-counter	Myeloid	ARAP1
MCP-counter	Myeloid	IL1RN
MCP-counter	Myeloid	SAT1
MCP-counter	Myeloid	FCGR1B
MCP-counter	Myeloid	FCGR1A
MCP-counter	Myeloid	TREM1
MCP-counter	Myeloid	PILRA
MCP-counter	Myeloid	CLEC5A
MCP-counter	Myeloid	SIGLEC5
MCP-counter	Myeloid	P2RY13
MCP-counter	Myeloid	IRAK3
MCP-counter	Myeloid	C5AR1
MCP-counter	Myeloid	TLR8
MCP-counter	Myeloid	LOC100129518
MCP-counter	Myeloid	CLEC4A
MCP-counter	Myeloid	CLEC4E
MCP-counter	Myeloid	NPL
MCP-counter	Myeloid	CXCL16
MCP-counter	Myeloid	GPR84
MCP-counter	Myeloid	NLRP12
MCP-counter	Myeloid	MXD1
MCP-counter	Myeloid	SLC43A2
MCP-counter	Myeloid	IL10RB-AS1
MCP-counter	Myeloid	MCEMP1
MCP-counter	Myeloid	PRAM1
MCP-counter	Myeloid	GLUL
MCP-counter	Myeloid	NFAM1
MCP-counter	Monocyte_derived	KYNU
MCP-counter	Monocyte_derived	PLA2G7
MCP-counter	Monocyte_derived	CD300C
MCP-counter	Monocyte_derived	ADAP2
MCP-counter	Monocyte_derived	RASSF4
MCP-counter	Monocyte_derived	FPR3
MCP-counter	Monocyte_derived	TFEC
MCP-counter	Fibroblast	PLXNA3
MCP-counter	Fibroblast	CEMIP
MCP-counter	Fibroblast	FGF7
MCP-counter	Fibroblast	PRR16
MCP-counter	Fibroblast	C1S
MCP-counter	Fibroblast	TAGLN
MCP-counter	Fibroblast	SRGAP1
MCP-counter	Fibroblast	MTSS1L
MCP-counter	Fibroblast	LRRN4CL
MCP-counter	Fibroblast	ITGBL1
MCP-counter	Fibroblast	ACTA2
MCP-counter	Fibroblast	MYL9
MCP-counter	Fibroblast	TIMP3
MCP-counter	Fibroblast	LUM
MCP-counter	Fibroblast	COL3A1
MCP-counter	Fibroblast	DCN
MCP-counter	Fibroblast	PDGFRB
MCP-counter	Fibroblast	COL1A1
MCP-counter	Fibroblast	COL1A2
MCP-counter	Fibroblast	PCOLCE
MCP-counter	Fibroblast	MYLK
MCP-counter	Fibroblast	FBLN1
MCP-counter	Fibroblast	THBS2
MCP-counter	Fibroblast	FBLN5
MCP-counter	Fibroblast	PDGFRA
MCP-counter	Fibroblast	PSG11
MCP-counter	Fibroblast	IGFBP5
MCP-counter	Fibroblast	STC2
MCP-counter	Fibroblast	LOXL1
MCP-counter	Fibroblast	FZD7
MCP-counter	Fibroblast	CNN1
MCP-counter	Fibroblast	LPAR1
MCP-counter	Fibroblast	PPP1R3C
MCP-counter	Fibroblast	LOX
MCP-counter	Fibroblast	COL16A1
MCP-counter	Fibroblast	FGF2
MCP-counter	Fibroblast	PSG5
MCP-counter	Fibroblast	TNFRSF11B
MCP-counter	Fibroblast	DDR2
MCP-counter	Fibroblast	RAB3B
MCP-counter	Fibroblast	WISP1
MCP-counter	Fibroblast	CDH11
MCP-counter	Fibroblast	PSG9
MCP-counter	Fibroblast	PSG6
MCP-counter	Fibroblast	THY1
MCP-counter	Fibroblast	COL6A2
MCP-counter	Fibroblast	EFEMP2
MCP-counter	Fibroblast	FAP
MCP-counter	Fibroblast	SGCD
MCP-counter	Fibroblast	MFGE8
MCP-counter	Fibroblast	PSG3
MCP-counter	Fibroblast	C1R
MCP-counter	Fibroblast	COL6A1
MCP-counter	Fibroblast	IGFBP3
MCP-counter	Fibroblast	ZCCHC24
MCP-counter	Fibroblast	ELN
MCP-counter	Fibroblast	MFAP4
MCP-counter	Fibroblast	ANGPTL2
MCP-counter	Fibroblast	CREB3L1
MCP-counter	Fibroblast	SVEP1
MCP-counter	Fibroblast	MXRA8
MCP-counter	Fibroblast	PAMR1
MCP-counter	Fibroblast	PARVA
MCP-counter	Fibroblast	ADAMTS2
MCP-counter	Fibroblast	HSPB6
MCP-counter	Fibroblast	OLFML3
MCP-counter	Fibroblast	GREM1
MCP-counter	Fibroblast	HSPB7
MCP-counter	Fibroblast	CD248
MCP-counter	Fibroblast	EVC
MCP-counter	Fibroblast	COPZ2
MCP-counter	Fibroblast	PRRX2
MCP-counter	Fibroblast	SH2D4A
MCP-counter	Fibroblast	VGLL3
MCP-counter	Fibroblast	GREM2
MCP-counter	Fibroblast	SYNC
MCP-counter	Fibroblast	GLT8D2
MCP-counter	Fibroblast	ADAMTS1
MCP-counter	Fibroblast	ITGA11
MCP-counter	Fibroblast	BACE1
MCP-counter	Fibroblast	ANTXR1
MCP-counter	Fibroblast	PAPPA
MCP-counter	Fibroblast	CCDC80
MCP-counter	Fibroblast	MIR100HG
MCP-counter	Fibroblast	COL12A1
MCP-counter	Fibroblast	VASN
MCP-counter	Fibroblast	SYNPO2
MCP-counter	Fibroblast	PCDH18
MCP-counter	Fibroblast	PODN
MCP-counter	Fibroblast	FIBIN
MCP-counter	Fibroblast	CLMP
MCP-counter	Fibroblast	RGMB
MCP-counter	Fibroblast	LINC01279
MCP-counter	Fibroblast	TMEM119
MCP-counter	Fibroblast	NFIX
MCP-counter	Fibroblast	PLAC9
MCP-counter	Fibroblast	SCARF2
MCP-counter	Fibroblast	MRGPRF
MCP-counter	Fibroblast	ALPK2
MCP-counter	Fibroblast	PRKG1
MCP-counter	Fibroblast	CNTN3
MCP-counter	Fibroblast	MASP1
MCP-counter	Fibroblast	DSEL
MCP-counter	Fibroblast	KRTAP1-5
MCP-counter	Fibroblast	FBN1
MCP-counter	Fibroblast	APCDD1L
MCP-counter	Fibroblast	MXRA7
MCP-counter	Fibroblast	MRC2
MCP-counter	Fibroblast	SYDE1
Functional signatures	Immunosuppression	CXCL12
Functional signatures	Immunosuppression	TGFB1
Functional signatures	Immunosuppression	TGFB3
Functional signatures	Immunosuppression	LGALS1
Functional signatures	checkpoint	CTLA4
Functional signatures	checkpoint	CD80
Functional signatures	checkpoint	CD86
Functional signatures	checkpoint	PDCD1
Functional signatures	checkpoint	CD274
Functional signatures	checkpoint	PDCD1LG2
Functional signatures	checkpoint	LAG3
Functional signatures	checkpoint	BTLA
Functional signatures	checkpoint	TNFRSF14
Functional signatures	checkpoint	VTCN1
Functional signatures	checkpoint	C10orf54
Functional signatures	checkpoint	CD28
Functional signatures	checkpoint	ICOS
Functional signatures	checkpoint	ICOSLG
Functional signatures	checkpoint	TNFRSF9
Functional signatures	checkpoint	TNFSF9
Functional signatures	checkpoint	CD276
Functional signatures	checkpoint	HAVCR2
Functional signatures	checkpoint	TNFRSF4
Functional signatures	checkpoint	CD27
Functional signatures	checkpoint	CD70
Functional signatures	checkpoint	IDO1
Functional signatures	checkpoint	KIR3DL1
Functional signatures	checkpoint	ADORA2A
Functional signatures	checkpoint	TNFRSF18
Functional signatures	checkpoint	CD40
Functional signatures	checkpoint	IL2RB

## Sheet: Table S2
Supplementary Table 2 : CIBERSORT data. Quantification of 22 tumor-infiltrating cell populations according to the immune subtypes.
	Cibersort proportion mean
	Pvalue	C1	C2	C3	C4
T cells regulatory (Tregs)	7.9723e-20	0.05026	0.110504	0.0921756	0.0590184
T cells follicular helper	1.66647e-16	0.0251678	0.062439	0.0307559	0.018339
T cells CD8	3.06805e-14	0.108483	0.331429	0.152954	0.122545
Macrophages M0	3.00069e-13	0.107876	0.179734	0.303207	0.166186
Plasma cells	3.26001e-09	0.00488948	0.0332044	0.00870988	0.0124339
Macrophages M2	3.41024e-09	0.212863	0.234996	0.34209	0.24817
T cells CD4 memory resting	6.03702e-08	0.138991	0.197592	0.195314	0.240713
T cells CD4 memory activated	2.06706e-07	0.012796	0.0393744	0.0221848	0.00619603
Macrophages M1	2.8998e-07	0.0926834	0.140688	0.132225	0.0998897
Dendritic cells resting	6.04021e-07	0.0211902	0.0351369	0.0564024	0.0323899
NK cells resting	6.45083e-07	0.0322984	0.0158837	0.00999008	0.0148431
NK cells activated	2.97742e-06	0.0367785	0.0607466	0.0532556	0.0483866
Dendritic cells activated	0.000781565	0.00562669	0.00109321	0.00373668	0.00163344
Neutrophils	0.00247796	0.00866458	0.00519966	0.0208253	0.00811167
T cells CD4 naive	0.0025112	0.00392715	0.000129369	0	0.00162716
Monocytes	0.0296455	0.0231869	0.0360214	0.0416221	0.0315205
Mast cells activated	0.0541857	0.00122793	0.00164833	0.00716476	0.00491677
B cells naive	0.067449	0.0399671	0.0989933	0.0371616	0.0595061
Eosinophils	0.0781271	0.00300071	0.00107949	0.00225562	0.00201481
B cells memory	0.0859688	0.00279317	0.00680092	0.00671055	0.00778469
T cells gamma delta	0.154446	0.0171801	0.0205646	0.0140934	0.010867
Mast cells resting	0.615623	0.0782907	0.0755314	0.0646045	0.0777481

## Sheet: Table S3
Supplementary Table 3: GSVA analysis of selected pathways for four TME subclasses.
		GSVA value mean
Dataset	Pathway	ANOVA Pvalue	C1	C2	C3	C4
BP	Hepatic stellate cell activation	2.40452e-08	-0.125347	-0.140824	0.104231	0.14874
BP	Extracellular matrix assembly	3.91715e-44	-0.339495	-0.161409	0.119119	0.335973
KEGG	TGF-β signaling	4.95397e-21	-0.242203	-0.172386	0.155678	0.194555
BP	Epithelial mesenchymal transition	5.67422e-48	-0.371214	-0.140903	0.167174	0.305423
BP	Angiogenesis	2.59665e-46	-0.364955	-0.140525	0.136278	0.312723
BP	Integrin mediated signaling pathway	5.2112e-37	-0.33532	-0.0450004	0.188436	0.213498
KEGG	Antigen processing and presentation	1.67977e-16	-0.216779	0.20961	0.15844	-0.0599679
BP	MHC class I biosynthetic process	5.83366e-11	-0.281486	0.185614	0.164105	-0.0081391
BP	MHC class II biosynthetic process	4.93383e-16	-0.313522	0.128292	0.225593	-0.053729
BP	MHC protein complex assembly	1.36145e-10	-0.295546	0.229727	0.24331	-0.059554
BP	Macrophage chemotaxis	5.19594e-20	-0.297345	0.100534	0.116813	0.0690156
Sylvie et al.	M2 macrophage polarization	1.49037e-11	-0.236598	0.117072	0.302515	-0.00235325
BP	Macrophage activation	5.37295e-18	-0.35256	0.00264478	0.290374	0.116494
BP	LPS mediated signaling pathway	1.50742e-18	-0.300646	0.0489324	0.22422	0.0328649
BP	TLR3 signaling pathway	1.13194e-12	-0.242329	-0.062255	0.308778	0.0615246
BP	B cell mediated immunity	8.25978e-22	-0.328831	0.259577	-0.0482197	0.016773
BP	B cell chemotaxis	6.93226e-08	-0.256675	0.136489	0.022801	0.0198302
Sylvie et al.	T cell survival	7.10283e-24	-0.255405	0.339836	0.0265427	-0.0515411
BP	T cell mediated cytotoxicity	6.53957e-19	-0.272345	0.193139	0.158522	-0.0507167
BP	CD8+ T cell differentiation	1.4212e-15	-0.321229	0.193135	0.146334	0.0274541
BP	CD8+ T cell activation	4.98477e-16	-0.305711	0.173736	0.167782	0.0264111
BIOCART	CTLA4 pathway	5.06202e-22	-0.35785	0.344376	0.134839	-0.0409647
PID	PD-1 signaling	1.40125e-23	-0.376978	0.407585	0.150122	-0.0239672

## Sheet: Table S4
Supplementary Table 4: Mutation characteristics in distinct HCC classification.
	C1	percentage (%)	C2	percentage (%)	C3	percentage (%)	C4	percentage (%)	P-value
Number of patients	106	100	89	100	40	100	118	100	NA
TP53	31	29.2453	22	24.7191	20	50	29	24.5763	0.015
ATM	2	1.88679	2	2.24719	2	5	5	4.23729	0.634
RB1	8	7.54717	4	4.49438	3	7.5	7	5.9322	0.156
CDKN2A	6	5.66038	1	1.1236	0	0	3	2.54237	0.5337
CTNNB1	41	38.6792	23	25.8427	10	25	13	11.0169	3.8e-05
AXIN1	7	6.60377	13	14.6067	3	7.5	9	7.62712	0.211
APC	7	6.60377	1	1.1236	0	0	5	4.23729	0.12
ALB	17	16.0377	8	8.98876	4	10	11	9.32203	0.338
APOB	16	15.0943	7	7.86517	4	10	9	7.62712	0.245
ARID1A	7	6.60377	9	10.1124	2	5	6	5.08475	0.486
ARID2	6	5.66038	10	11.236	1	2.5	3	2.54237	0.049
KMT2A	3	2.83019	2	2.24719	1	2.5	5	4.23729	0.851
KMT2B	9	8.49057	3	3.37079	0	0	3	2.54237	0.058
KMT2C	3	2.83019	1	1.1236	1	2.5	6	5.08475	0.429
ARID1B	4	3.77358	4	4.49438	0	0	1	0.847458	0.22

## Sheet: Table S5
Supplementary Table 5: Clinical Characteristics of patients with distinct classification in TCGA cohort.
Variable	Subclass 1	Subclass 2	Subclass 3	Subclass 4	P-value
	N=109	N=90	N=42	N=124
Median age (%)					0.056
≤55years	26 (24)	30 (33)	16 (38)	50(40)
>55years	83 (76)	60 (67)	26 (62)	74(60)
Gender (%)					0.435
Male	76 (70)	62 (69)	31 (74)	77(62)
Female	33 (30)	28 (31)	11 (26)	47(38)
Alcohol consumption (%)					0.467
Yes	33 (32)	32 (37)	16 (40)	34(28)
No	70 (68)	54 (63)	24(60)	84(72)
Virus infection (%)					0.048
HBV	14 (13)	12 (13)	11 (26)	23(18)
HCV	2 (2)	7 (8)	2 (5)	8(6)
HBV/HCV	24 (22)	15 (17)	13 (31)	31(25)
No infection	69 (63)	56 (62)	16 (35)	62(50)
AFP level (%)					0.093
Low(≤50ng)	64 (74)	42 (57)	18 (58)	57(67)
High(>50ng)	22 (26)	32 (43)	13 (42)	28(33)
Child-Pugh score					0.807
A	70 (90)	60 (90)	21 (91)	65(93)
B/C	8 (10)	7 (10)	2 (9)	5(7)
Histologic grade (%)					0.22
G1	18 (17)	14 (6)	2 (6)	21(17)
G2	52 (50)	44 (44)	20(47)	59(48)
G3	34 (32)	25 (44)	20 (47)	39(32)
G4	3 (1)	6(6)	0 (7)	3(3)
TNM stage (%)					0.002
I/II	76 (73)	73 (85)	29 (70)	78(70)
III/IV	28 (27)	13(15)	12 (30)	34(30)
Boyault classification (%)					1.31e-11
G1&G2	22(20)	35 (39)	9 (21)	68(55)
G3	23 (21)	23 (26)	24 (58)	33(27)
G5&G6	64 (59)	32 (35)	9 (21)	23(17)
Chiang classification (%)					4.52e-13
CTNNB1 class	40 (37)	13 (14)	4 (9)	9(7)
interferon class	9 (9)	11 (12)	4 (9)	26(21)
chromosome 7 polysomy class	28 (26)	13 (14)	2 (4)	14(12)
proliferation class	16 (14)	40 (45)	30 (74)	51(41)
unannotated class	16 (14)	13 (15)	2 (4)	24(19)
Hoshida classification (%)					8.94e-16
S1	6 (5)	20 (53)	62 (2)	35(28)
S2	10 (7)	30 (34)	7 (17)	21(17)
S3	84 (91)	40 (13)	9 (21)	68(55)
Lee classification (%)					9.77e-09
High survival	79 (72)	60 (67)	9 (21)	59(47)
Low survival	30 (28)	30 (33)	33 (79)	65(53)
Lachenmayer classification (%)					6.81e-22
CTNNB1-class	91 (83)	39 (43)	10 (24)	26(21)
Wnt-TGFβ-class	18 (17)	51 (57)	32 (76)	98(79)
AFP, α-fetoprotein; TNM, tumor node metastasis

## Sheet: Table S6
Supplementary Table 6: Clinical Characteristics of patients with distinct classification in CHCC-HBV cohort.
Variable	Subclass 1	Subclass 2	Subclass 3	Subclass 4	P-value
	N=74	N=22	N=21	N=42
Median age (%)					0.108
≤55years	36 (48)	11 (50)	11 (51)	71(40)
>55years	38 (52)	11 (50)	10 (49)	29(60)
Gender (%)					0.051
Male	61 (82)	14 (64)	20 (95)	33(78)
Female	13 (18)	8 (36)	1 (5)	9(22)
Liver cirrhosis (%)					0.206
Yes	47 (63)	17 (77)	18 (85)	30(71)
No	27 (37)	5 (23)	3 (15)	12(29)
Tumor size (%)					0.094
<=5 cm	32 (43)	15 (68)	7 (33)	22(52)
>5 cm	42 (57)	7 (32)	14 (67)	20 (48)
AFP level (%)					0.643
Low(≤50ng)	34 (46)	7 (32)	10 (48)	17(40)
High(>50ng)	40 (54)	15 (68)	11 (52)	25(60)
Tumor thrombus (%)					0.383
No	55 (74)	20 (91)	15 (71)	32(76)
Yes	19 (26)	2 (9)	6 (29)	10(24)
BCLC stage (%)					0.156
A	27 (36)	13 (60)	6 (29)	22(52)
B	28 (37)	7(31)	7(33)	10(24)
C	19 (27)	2 (9)	8 (38)	10(24)
TNM stage (%)					0.011
I/II	47 (63)	16 (72)	11 (52)	31(74)
III/IV	27 (37)	6(28)	10 (48)	11(26)
Boyault classification (%)					0.014
G1&G2	27(36)	13 (60)	5 (24)	26(61)
G3	17 (22)	3 (13)	10 (48)	8(19)
G5&G6	30 (42)	6 (27)	6 (28)	10(20)
Chiang classification (%)					0.007
CTNNB1 class	20 (27)	3 (13)	3 (14)	4 (10)
interferon class	14 (19)	5 (23)	4 (10)	15(35)
chromosome 7 polysomy class	13 (17)	2 (8)	1 (4)	0 (0)
proliferation class	19 (25)	7 (33)	10 (48)	21(50)
unannotated class	8 (12)	5 (23)	3 (14)	2(5)
Hoshida classification (%)					0.031
S1	13 (17)	6 (28)	12 (57)	12(28)
S2	24 (32)	8 (36)	3 (15)	13(31)
S3	37 (51)	8 (36)	6 (28)	19(41)
Lee classification (%)					0.038
High survival	46 (62)	14 (64)	7 (36)	19(45)
Low survival	28 (38)	8 (36)	14 (64)	25(55)
Lachenmayer classification (%)					9e-06
CTNNB1-class	47 (63)	8 (36)	4 (19)	9 (21)
Wnt-TGFβ-class	27 (37)	14 (64)	17 (81)	33(79)
Protein subgroup (%)					0.033
S-Mb	25 (34)	9 (41)	4 (19)	17 (40)
S-Me	35 (47)	5 (22)	7 (33)	10 (24)
S-Pf	14 (19)	8 (37)	10 (48)	15 (36)
mRNA_subgroup (%)					8.8627e-09
Subgroup 1	17 (23)	13 (60)	7 (33)	22(52)
Subgroup 2	45 (61)	0 (0	5 (24)	4(9)
Subgroup 3	12 (16)	9 (41)	9 (43)	16(39)
AFP, α-fetoprotein; TNM, tumor node metastasis

## Sheet: Table S7
Supplementary Table 7: Clinical Characteristics of patients in Zhejiang cohort.
ID	Age (year)	BMI (kg/m2)	Edmondson degree	AFP in IHC	AFP in serum (ng/mL)	ALT (U/L)	AST (U/L)	Albumin (g/L)	Prothrombin time (s)	Total bilirubin (μmol/L)	Total cholesterol (mmol/L)	High-density lipoprotein (mmol/L)	Low-density lipoprotein (mmol/L)	Child-Pugh	Cirrhosis	HBV infection	Alcohol related	Predicted subclass
zfh001	56-60	22.6562	2	0	1.8	57	45	40.8	10.3	10	4.81	1.09	2.76	A	0	Yes	0	C1
zfh003	56-60	23.1978	2	0	4.9	14	25	40	11.5	16	3.71	0.99	1.87	A	0	Yes	1	C4
zfh004	56-60	26.1042	3	0	31417.7	50	61	44.8	12.9	16	4.12	0.85	1.97	A	1	Yes	1	C2
zfh005	40-45	22.9219	3	0	8.9	43	30	39.6	11	7	4.59	0.76	2.6	A	1	Yes	0	C3
zfh006	46-50	19.0776	2	0	14.4	24	25	35.8	11.8	4	3.95	1.22	2.02	A	1	Yes	1	C2
zfh007	50-55	27.7551	3	0	2.2	22	20	40.1	11.6	11	4.31	0.88	2.54	A	0	Yes	1	C4
zfh009	50-55	24.8358	2	1	＞ 80000.00	57	74	38.4	12.2	23	4.4	1.37	2.21	A	1	Yes	1	C2
zfh010	56-60	20.7008	1	0	339.2	145	159	33.8	12.2	8	4.15	0.94	2.18	A	1	Yes	0	C4
zfh011	56-60	20.7031	2	0	4.5	24	25	37.3	10.8	15	4.22	1	2.3	A	1	Yes	1	C1
zfh012	50-55	22.6757	3	0	2.7	92	63	36.4	12.4	8	5.9	0.77	3.73	A	0	Yes	1	C1
zfh013	46-50	27.3356	2	1	206	16	22	33.3	10.6	13	3.82	0.84	2.06	A	1	Yes	1	C4
zfh014	56-60	19.052	2	1	36134.6	141	123	34.1	17.2	355	8.77	0.36	2.22	B	0	Yes	0	C4
zfh015	50-55	26.2188	2	1	3918.6	25	40	45.4	11.6	16	5.03	1.15	2.82	A	1	Yes	0	C4
zfh016	46-50	18.8272	3	0	4986.5	36	62	37.8	10.7	17	3.34	1.26	1.69	A	0	Yes	0	C1
zfh017	60-65	22.0386	3	0	12.8	18	24	42.4	12.1	17	3.45	1.09	1.75	A	0	Yes	1	C4
zfh018	46-50	24.8016	2	0	963.6	23	92	42.2	11.1	19	4.67	1.33	3.05	A	0	Yes	0	C1
zfh019	46-50	22.0386	1	1	67.5	11	22	40	12.2	12	4.05	1.03	1.84	A	1	Yes	1	C4
zfh020	56-60	23.3887	3	0	1.7	22	24	39.9	12.6	15	3.92	1.06	2.15	A	1	Yes	0	C3
zfh021	56-60	15.7558	2	0	3.7	8	19	39.4	11.9	10	3.36	0.78	1.95	A	1	Yes	0	C1
zfh022	56-60	25.7812	3	0	3.6	41	38	45.8	12	18	4.05	1.27	2.29	A	1	Yes	0	C1
zfh023	56-60	23.9995	1	0	12.9	46	34	35	10.9	7	0.22	1.79	2.82	A	1	Yes	1	C2
zfh024	36-40	22.8571	2	0	37.1	26	27	47.3	12.7	17	4.43	1.1	2.5	A	1	Yes	0	C4
zfh025	56-60	23.8054	2	1	122.7	46	38	41.8	13.1	20	2.46	0.87	1.17	A	1	Yes	0	C4
zfh026	56-60	22.4996	3	1	35	30	24	38.2	13	23	3.47	1.37	1.86	A	1	Yes	0	C4
zfh027	50-55	23.7387	1	1	15.7	25	20	37	10.9	20	2.62	0.75	1.31	A	1	Yes	1	C2
zfh028	60-65	20.5882	3	0	4	18	26	37.6	11.3	11	3.65	1.09	1.96	A	0	Yes	1	C2
zfh029	50-55	21.1203	3	1	38.3	18	22	39.2	13.9	13	2.26	0.94	1	A	1	Yes	1	C4
zfh030	40-45	27.7634	2	0	10.2	95	64	38	18	11	4.22	1.32	2.27	A	1	Yes	1	C2
zfh031	30-35	21.3039	3	0	4.7	56	57	45.5	10.4	8	4.55	0.94	2.45	A	1	Yes	0	C4
zfh032	56-60	25	3	1	49.7	20	34	44	13.1	17	4.21	1.08	2.28	A	1	Yes	0	C4
zfh033	56-60	19.9481	1	na	4.4	20	22	42	10.5	18	5.1	1.74	2.83	A	0	Yes	1	C4
zfh034	60-65	20.0692	2	0	54.9	20	20	42	11.3	20	3.47	1.07	2.01	A	0	Yes	1	C4

## Sheet: Table S8
Supplementary Table S8 Clinical characteristics summary of patients in Zhejiang cohort.
Clinical and pathological index	n=32
Age (year)	53.69±6.91
Gender
Female	3 (9%)
Male	29 (91%)
BMI	22.77±2.82
AFP (ng/mL)
≤20	17 (53%)
>20	15 (47%)
Tumor differentiation
I-II	19 (59%)
III-IV	13 (41%)
Liver cirrhosis	21 (66%)
Child-Pugh
A	31(97%)
B	1 (3%)
ALT (U/L)	40.28±34.05
AST (U/L)	43.16±32.06
ALB (g/L)	39.84±3.67
Prothrombin time (s)	12.12±1.71
Total bilirubin (μmol/L)	24.84±60.45
Total cholesterol (mmol/L)	4.04±1.33
High-density lipoprotein (mmol/L)	1.06±0.28
Low-density lipoprotein (mmol/L)	2.20±0.55
HBV infection	32 (100%)
Alcohol related	17 (53%)
